# Supplementary material
Source: Research Square preprint supplement (doi:10.21203/rs.3.rs-9407908/v1)
Supplement: Supplementary file 1 [file 7dbd1b26af1aa821e5583ca8.docx]

**
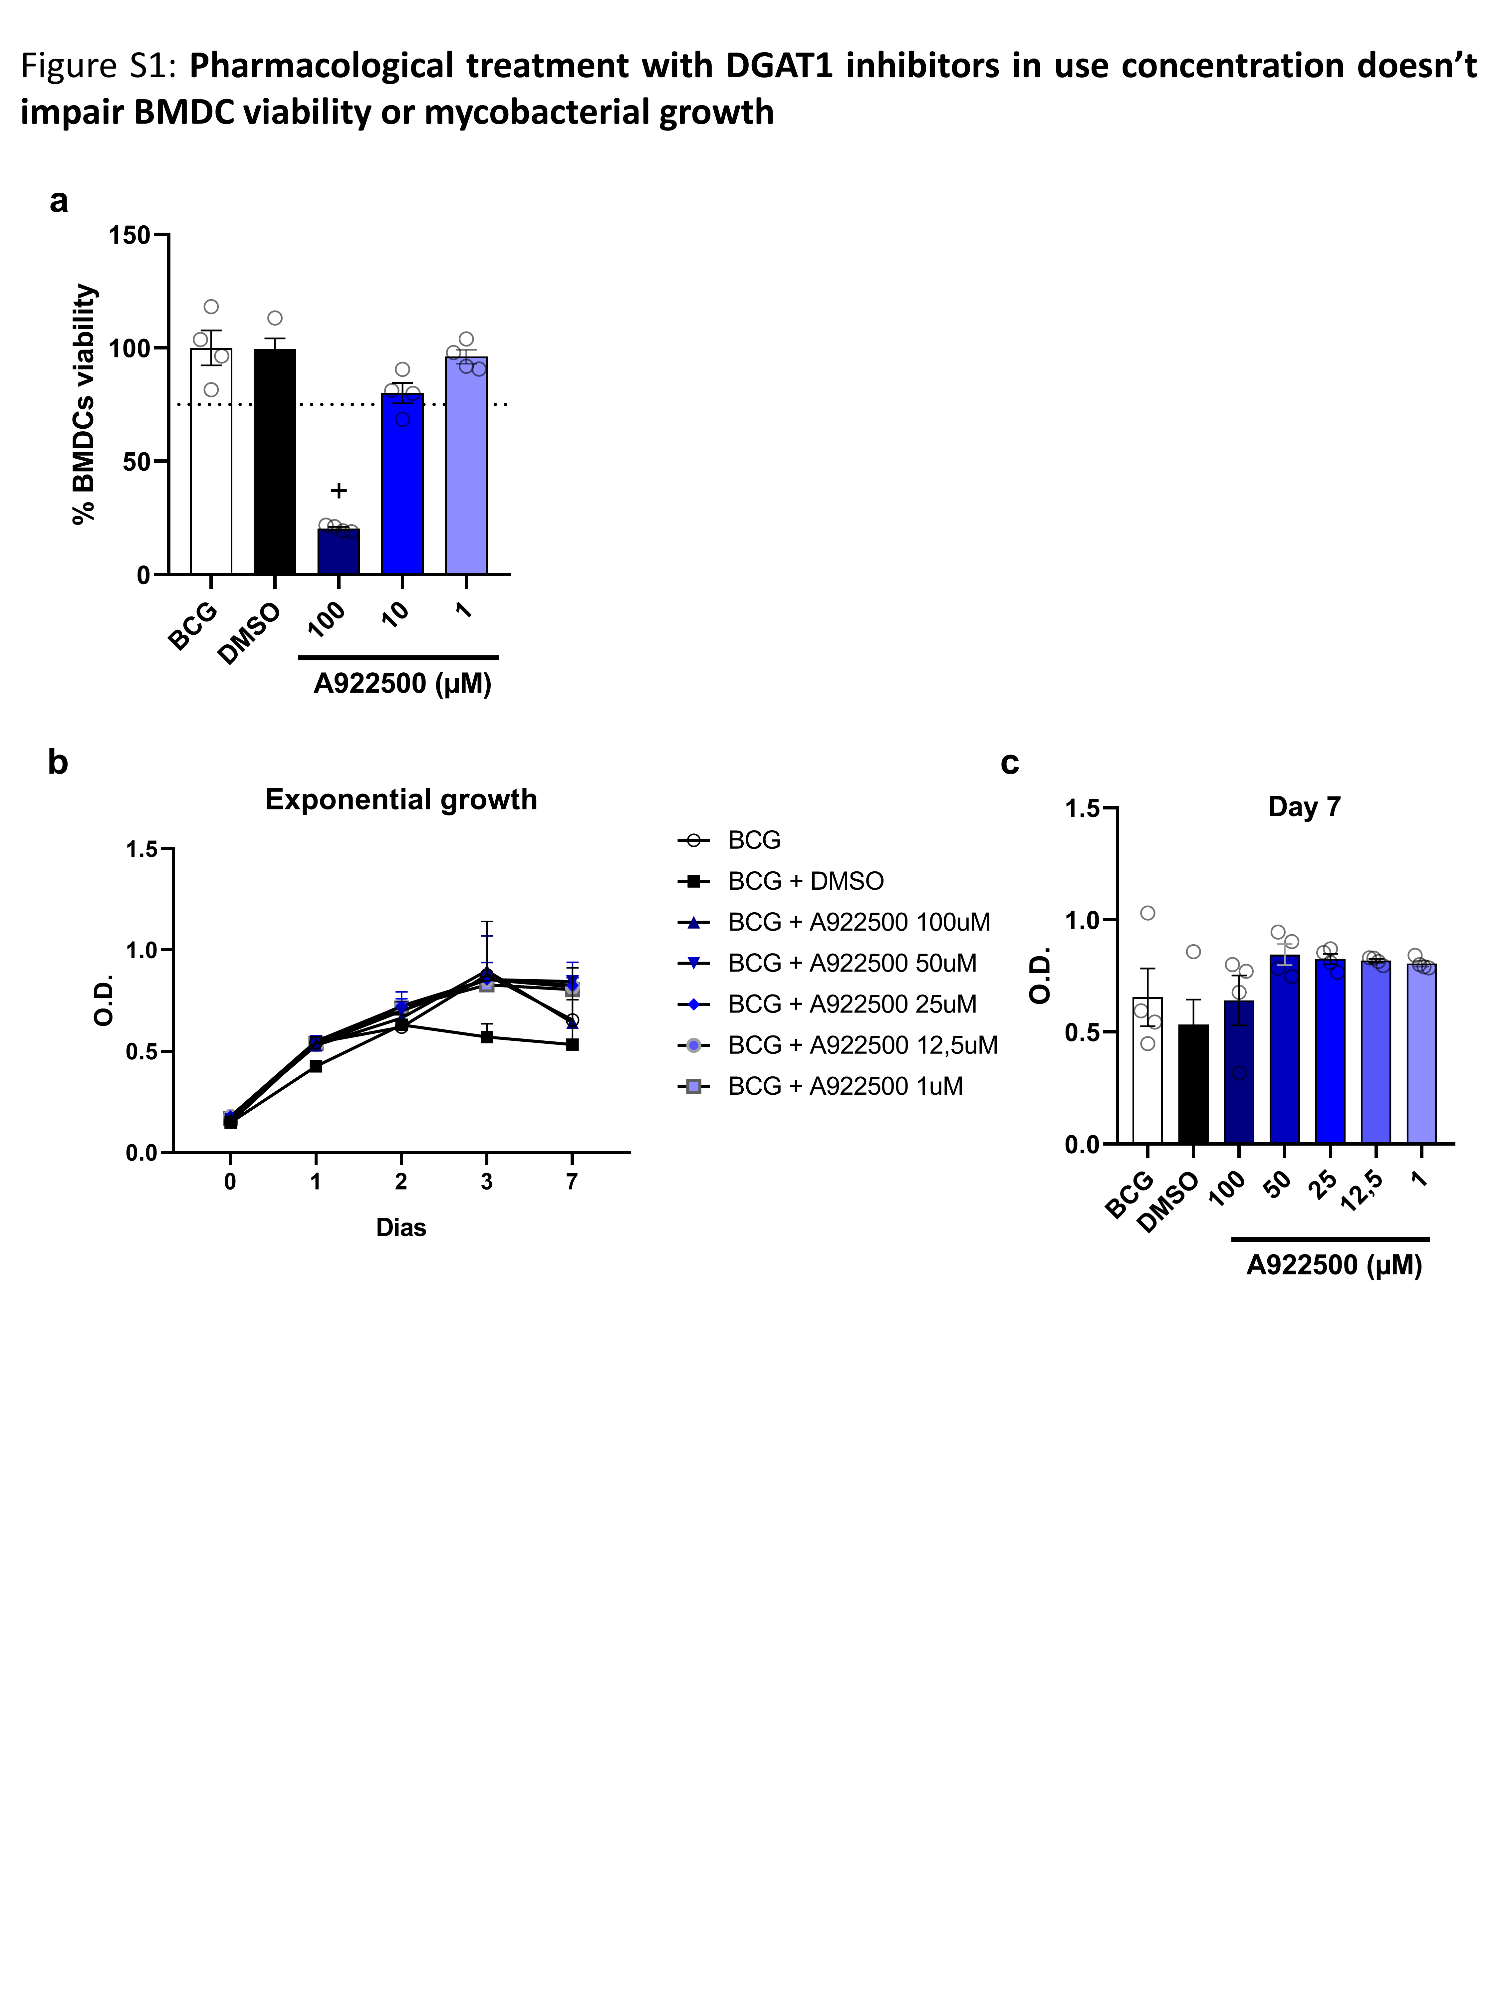
Figure S1. Pharmacological treatment with DGAT1 inhibitors in use concentration doesn’t impair BMDC viability or mycobacterial growth.** BMDC and BCG culture were incubated with different concentrations (1-100 µM) of DGAT1 inhibitors. BMDCs' viability with (a) A922500 (1-100 µM) and (b) PF-04620110 (6-50 µM) concentrations measured by the MTT method. (c) Kinetics of bacterial growth from 0 to 7 days after treatment with A922500. Bacterial growth was measured by optical density at 600nm. (d) Optical density of BCG growth at day 7 with A922500 concentrations (1-100 µM). Data from one representative experiment are presented as the average ± SEM for at least 3 replicates. + indicates statistically significant differences (p ≤ 0.05) between nontreated and treated groups as determined by ANOVA followed by Tukey test or Student’s t test.

**
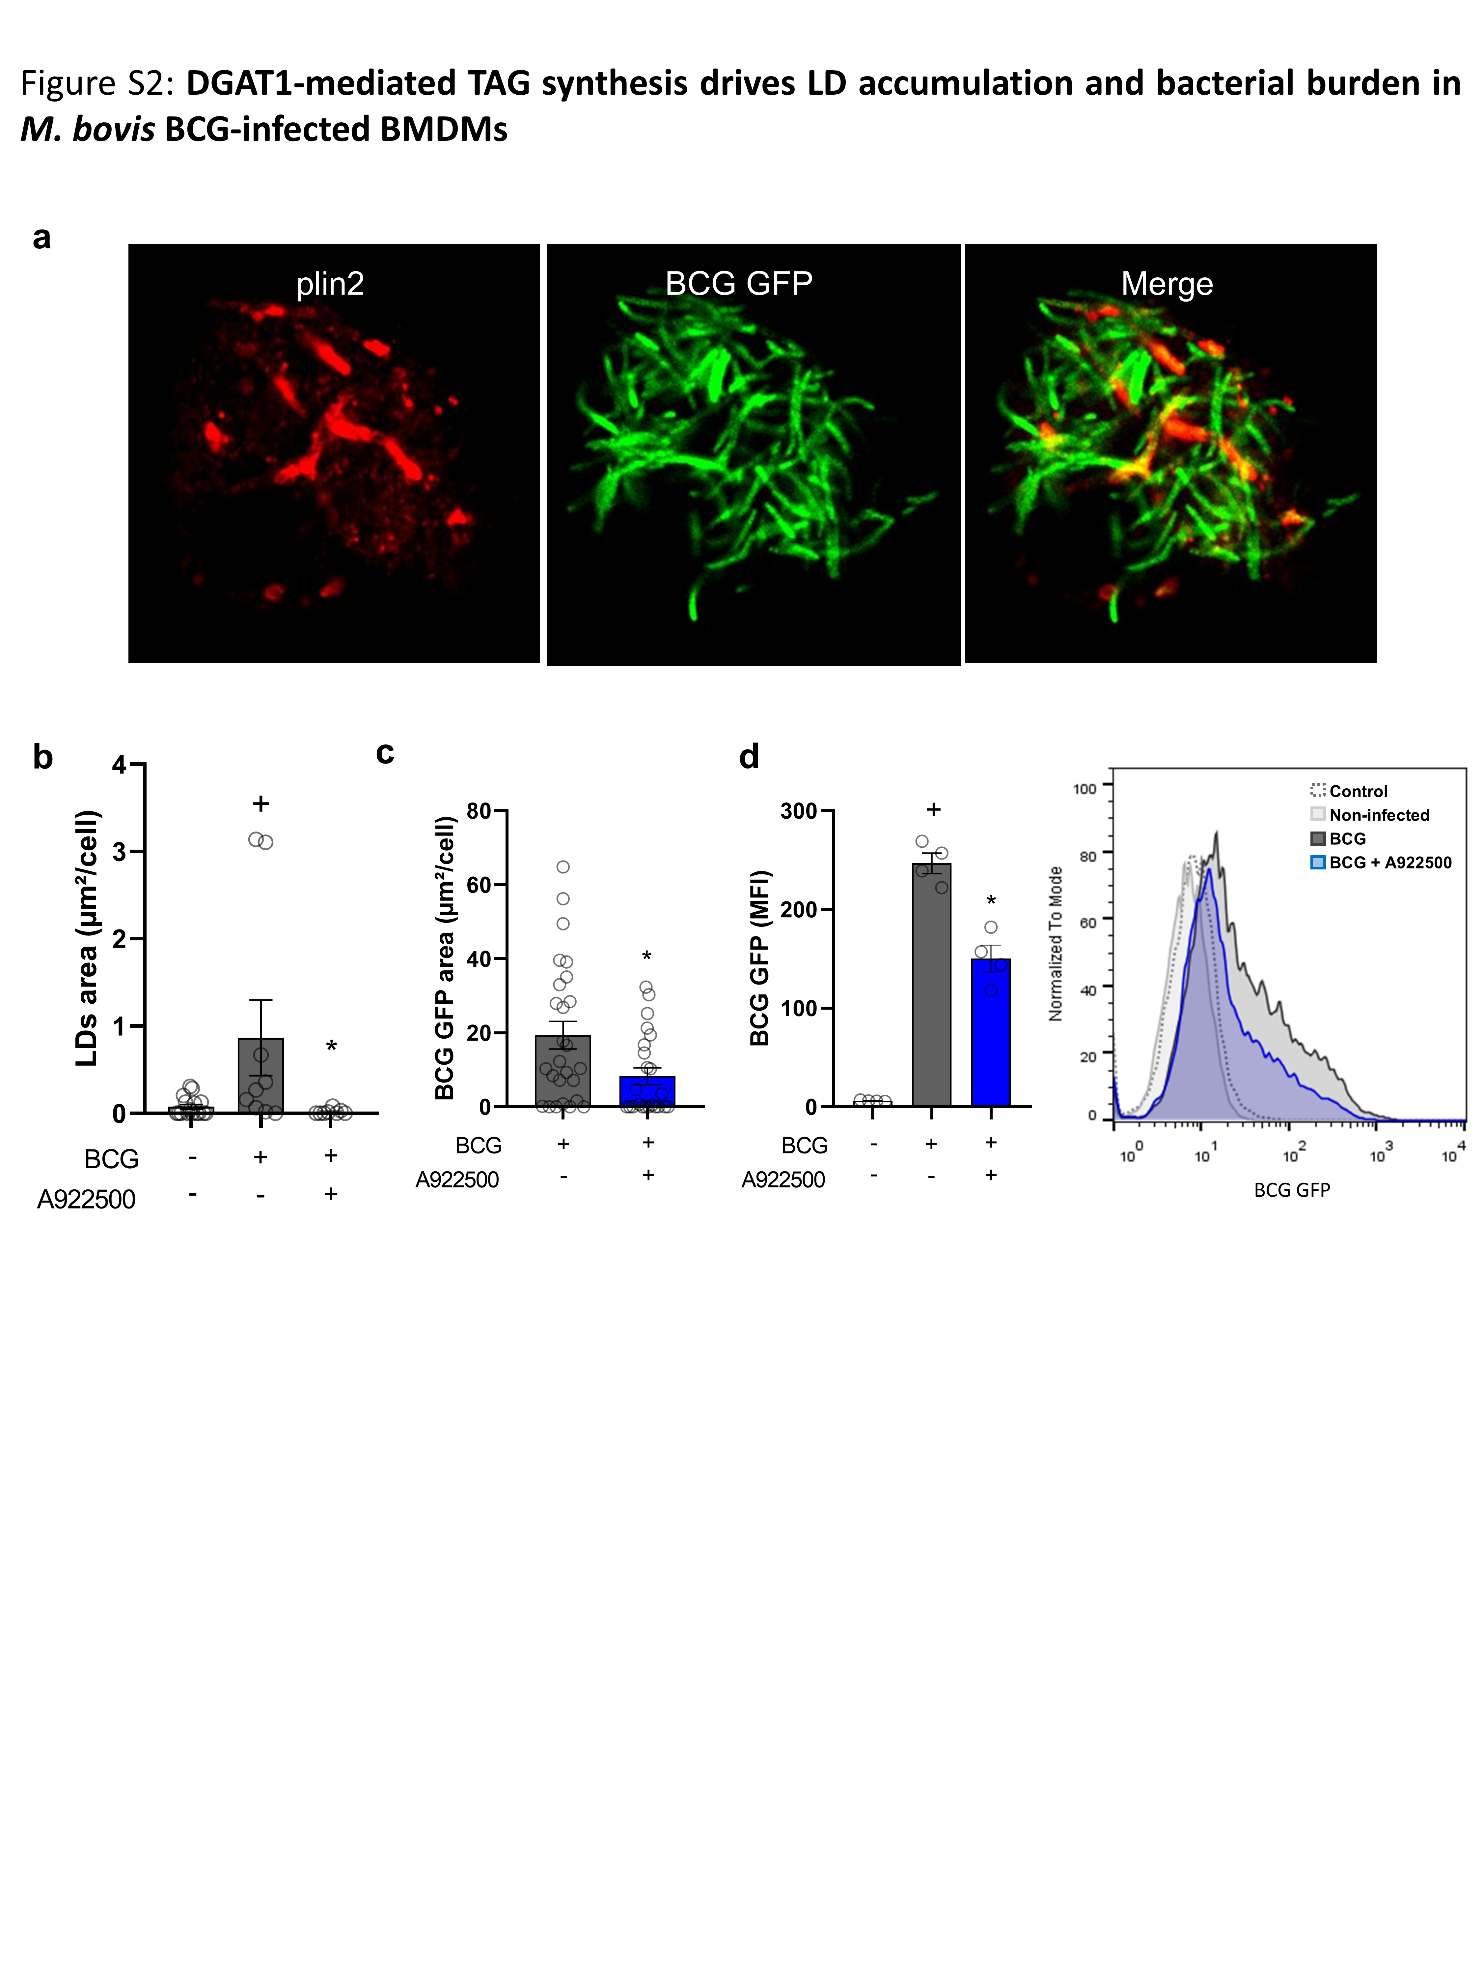
Figure S2. DGAT1-mediated TAG synthesis drives LD accumulation and bacterial burden in *M. bovis* BCG-infected BMDMs.** BMDMs were infected with BCG GFP and treated with DGAT1 pharmacological inhibitor A922500 at 20 µM. (a) Representative image of high-resolution microscopy of BCG GFP at MOI 3 in BMDMs stained with anti-plin2 (red) 24 hpi. (b) LDs accumulation in infected with BCG at MOI 5 and treated BMDMs was measured by LDs area stained with ORO 72 hpi. (c) BCG growth in infected at MOI 5 and treated BMDMs measured by GFP area 72 hpi. (d) Bacterial burden on infected at MOI 5 and treated BMDMs was evaluated by MFI of GFP-expressing BCG and its histogram 72 hpi. Data from one representative experiment are presented as the average ± SEM for at least 3 replicates. + indicates statistically significant differences (p ≤ 0.05) between nonstimulated and infected groups; * indicates statistically significant differences (p ≤ 0.05) between infected and treated groups, as determined by ANOVA followed by Tukey test or Student’s t test.
